# Supplementary material for: Risk Factors for Invasive Pulmonary Aspergillosis in Critically Ill Patients With Coronavirus Disease 2019-Induced Acute Respiratory Distress Syndrome
Source: PubMed Central journal article supplement — Crit Care Explor. 2020 Nov 11;2(11):e0244. doi: 10.1097/CCE.0000000000000244 (PMC7665250; doi:10.1097/cce.0000000000000244), 2020-11-11
Supplement: cc9-2-e0244-s001.pdf [file cc9-2-e0244-s001.pdf]

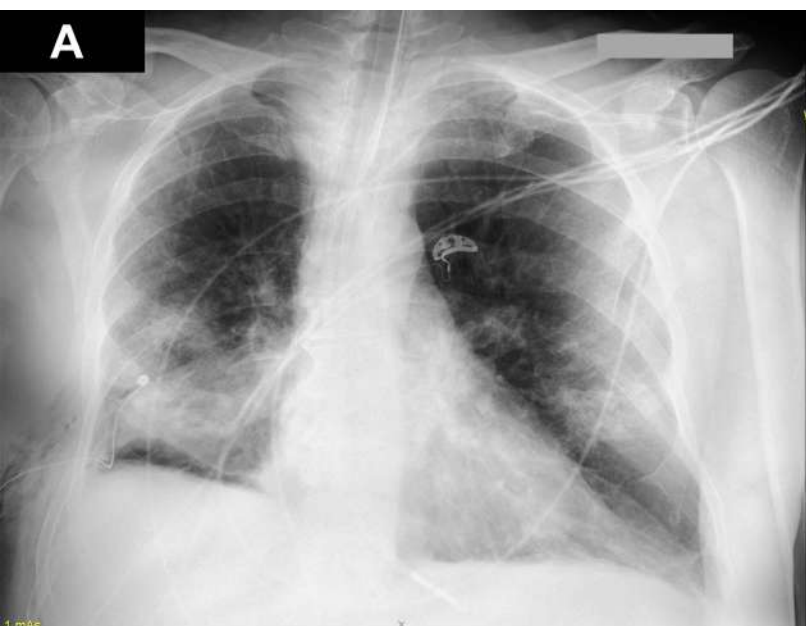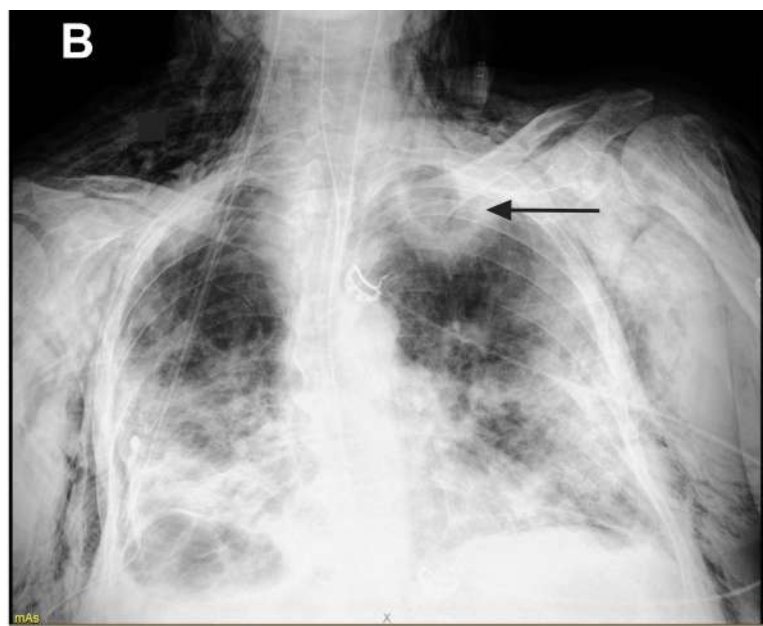

**Supplemental Figure 1 legend:** Compared to the Chest x-ray taken 3 days before, when dexamethasone had just been introduced for severe COVID-19 pneumonia (A), a new pulmonary radiograph (B) revealed a large excavation of the left upper lobe (dark arrow) caused by fulminant invasive pulmonary aspergillosis.
